# Supplementary material for: Refocus on Immunogenic Characteristics of Convalescent COVID-19 Challenged by Prototype SARS-CoV-2
Source: MDPI journal article supplement (doi:10.3390/vaccines11010123), 2023-01-04
Supplement: s1 [file s1]

## Supplementary Materials

**Table S2.** Cross-reactivity between SARS-CoV-2 and six other human coronaviruses.

|           | SARS-CoV-2-S-IgM | SARS-CoV-2-S-IgG | SARS-CoV-2-N-IgM | SARS-CoV-2-N-IgG |
|-----------|------------------|------------------|------------------|------------------|
| SARS-CoV  | 51.32%           | 78.25%           | 89.52%           | 100.00%          |
| MERS-CoV  | 25.59%           | 14.89%           | 28.23%           | 26.18%           |
| HCoV-OC43 | 38.64%           | 85.79%           | 3.31%            | 80.06%           |
| HCoV-HKU1 | 13.69%           | 90.49%           | 14.05%           | 73.03%           |
| HCoV-229E | 8.31%            | 97.04%           | 43.80%           | 96.90%           |
| HCoV-NL63 | 13.06%           | 83.83%           | 30.33%           | 87.15%           |

**Table S3.** Univariate variance analyses of all the general characteristics associated with antibody levels.

### (一) Basic characteristics

| Variables                        | F-value       | P-value          |
|----------------------------------|---------------|------------------|
| Gender                           | 3.403         | 0.066            |
| <b>Age (years)</b>               | <b>3.195</b>  | <b>0.002</b>     |
| <b>Occupation</b>                | <b>2.535</b>  | <b>0.040</b>     |
| <b>Highest clinical Severity</b> | <b>13.962</b> | <b>&lt;0.001</b> |
| Comorbidity                      | 2.852         | 0.092            |

### (二) Clinical characteristics

| Variables                                 | F-value       | P-value          |
|-------------------------------------------|---------------|------------------|
| <b>Sampling time</b>                      | <b>9.361</b>  | <b>&lt;0.001</b> |
| <b>Fever</b>                              | <b>29.287</b> | <b>&lt;0.001</b> |
| Cough                                     | 0.073         | 0.787            |
| Weakness                                  | 2.808         | 0.095            |
| <b>Muscle pain</b>                        | <b>5.976</b>  | <b>0.015</b>     |
| Diarrhea                                  | 0.004         | 0.951            |
| Dyspnea                                   | 0.085         | 0.771            |
| <b>Oxygen Inhalation treatment degree</b> | <b>8.874</b>  | <b>&lt;0.001</b> |

|                                         |               |                  |
|-----------------------------------------|---------------|------------------|
| Oxyhydrogen atomizer treatment          | 1.597         | 0.207            |
| <b>Noninvasive ventilator treatment</b> | <b>20.641</b> | <b>&lt;0.001</b> |
| Tracheal cannula treatment              | 2.209         | 0.138            |
| Tracheotomy treatment                   | 0.133         | 0.715            |
| ECMO treatment                          | 0.157         | 0.692            |
| CRRT treatment                          | 1.313         | 0.253            |
| <b>ICU treatment</b>                    | <b>8.915</b>  | <b>0.003</b>     |
| Anti-infective drugs treatment          | 2.842         | 0.093            |
| Vasoactive drug treatment               | 0.529         | 0.467            |
| <b>Hormone treatment</b>                | <b>34.258</b> | <b>&lt;0.001</b> |

Note: The F value is not chi-square value, because we studied the antibody titers that is the numerical data is not the categorical data.

(三) Laboratory test characteristics (continuous variables)

| Variables                                             | Correlation coefficient r |
|-------------------------------------------------------|---------------------------|
| <b>Temperature(°C)</b>                                | <b>0.210**</b>            |
| Respiration(times/min)                                | 0.095                     |
| Pulse(times/min)                                      | 0.071                     |
| Systolic blood pressure (mmHg)                        | 0.058                     |
| Diastolic blood pressure (mmHg)                       | 0.036                     |
| Mean arterial pressure (mmHg)                         | 0.046                     |
| White blood cell count ( $\times 10^9$ /L)            | 0.060                     |
| <b>Neutrophil count (<math>\times 10^9</math> /L)</b> | <b>0.184**</b>            |
| <b>Lymphocyte count (<math>\times 10^9</math> /L)</b> | <b>-0.195**</b>           |
| Aspartate aminotransferase (U/ L)                     | 0.028                     |

Note: (a) \*Correlation significant at the 0.05 level; \*\*correlation significant at the 0.01. (b) Level bold lettering denotes statistically significant associations.
